# Supplementary material for: Factors Influencing Attitudes of University Students towards ChatGPT and its Usage: A Multi-National Study Validating the TAME-ChatGPT Survey Instrument
Source: Preprints.org preprint supplement (doi:10.20944/preprints202309.1541.v1), 2023-09-22

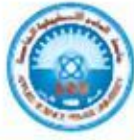

ASU  
Applied Science Private University

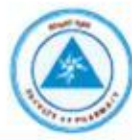

FOP  
كلية الصيدلة  
Faculty of Pharmacy

جامعة كل العرب

## INSTITUTIONAL REVIEW BOARD (IRB)

3<sup>rd</sup>/May./2023

### Letter for IRB Protocol Approval

**Approval Number:** 2023-PHA-21

**Research Title:** Attitude and Usage of ChatGPT among University Students in Arab-Speaking Countries: A Multi-National Study Using the Validated TAME-ChatGPT Tool.

**Investigators:** Muna Barakat, Malik Sallam, Nesreen A. Salim, Ala'a B. Al-Tammemi, Souheil Hallit, Rabih Hallit and Diana Malaeb.

Dear investigators,

The institutional review board in the faculty of pharmacy- Applied Science Private University has approved the above referenced protocol.

Date of approval: 3<sup>rd</sup>/May./2023, Date of expiration: 2<sup>nd</sup>/May./2025.

During this one year approval period, regular reviews are required. The protocol is due for a first review no later than 3<sup>rd</sup>/Aug./2023, and a second review no later than 3<sup>rd</sup>/Nov./2023.

The IRB staff will make every effort to send investigators regular reminders. However, investigators are responsible for submitting a regular review in advance of the review due date to ensure the continuity of IRB approval. It is very important that these deadlines are not missed. Failure to submit a regular review on time may result in the termination of the protocol. To continue this research beyond the one year approval period, a new protocol submission will be required.

It is the responsibility of the investigators to notify the IRB of any proposed changes regarding the work described within this protocol. Investigators agree that no such changes will be implemented until approval by the IRB, except where absolutely necessary to eliminate apparent immediate hazards to person(s).

**Dr. Feras Elhajji**

**IRB Chair**

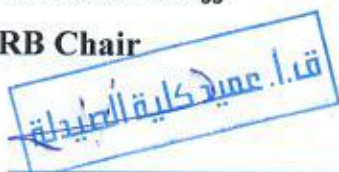

Supplement: Supplementary file 1 [file supplementary]
