# Supplementary material for: Factors Influencing Attitudes of University Students towards ChatGPT and its Usage: A Multi-National Study Validating the TAME-ChatGPT Survey Instrument
Source: Preprints.org preprint supplement (doi:10.20944/preprints202309.1541.v1), 2023-09-22
Supplement: Supplementary file 1 [file supplementary]

**Appendix S1.** **Consent form and TAME-ChatGPT scale**

شكراً على الاهتمام بالمشاركة في هذه الدراسة البحثية

يهدف الباحثون في هذه الدراسة إلى معرفة الآراء والمُعتقدات لدى الطلاب الذين يدرسون حالياً في الجامعات العربية تجاه برنامج تشات جي بي تي الذي يعتمد على تكنولوجيا الذكاء الاصطناعي...

الوقت المطلوب: 5 دقائق.

من خلال الاستمرار في الاستبيان ، فإنك توافق على العبارات التالية:

1. أفهم أن إجاباتي لن يتم الكشف عنها لأي شخص وأن هويتي ستبقى مجهولة. لن يتم كتابة اسمي في الاستبيان ولن يتم الاحتفاظ به في أي سجلات أخرى.
2. أقر بأنني طالب أدرس حالياً في جامعة عربية.
3. عندما يتم الإبلاغ عن نتائج الدراسة ، لن يتم تحديد هويتي بالاسم أو بأي معلومات أخرى يمكن استخدامها لاستنتاج هويتي. سيتمكن الباحثون فقط من الوصول لعرض أي بيانات تم جمعها خلال هذا البحث ولكن لا يمكن ربط البيانات بي.
4. لقد تم إبلاغي بأن البحث يلتزم بجميع القواعد الأخلاقية المعترف بها بشكل عام وأن مشروع البحث قد تمت مراجعته والموافقة عليه من قبل جامعة العلوم التطبيقية في الأردن
5. لقد قرأت وفهمت جميع البيانات الواردة في هذا النموذج.
6. أوافق طواعية على المشاركة في هذا المشروع البحثي من خلال استكمال الاستبيان التالي.

Thank you for your interest in participating in this study...

The researchers in this study aim to investigate the attitude of university students who are currently studying in universities in Arab countries towards the ChatGPT, which is based on artificial intelligence...

Time required to complete the survey: 5 minutes.

By continuing the survey, you agree to the following statements:

1. I understand that my answers will not be disclosed to anyone and that my identity will remain anonymous. My name will not be written on the survey, nor will it be kept on any other records.
2. I declare that I am a student currently studying at a university in Arab-speaking country.
3. When the results of the study are reported, I will not be identified by name or by any other information that can be used to infer my identity. Researchers will only have access to view any data collected during this research, but the data cannot be linked to me.
4. I have been informed that the research adheres to all generally recognized ethical rules and that the research project has been reviewed and approved by the Applied Science University in Jordan
5. I have read and understood all statements contained in this form.
6. I voluntarily agree to participate in this research project by completing the following questionnaire.

**Informed Consent Item (Mandatory)**

**هل تُوافق على المشاركة في هذه الدراسة؟ --- Do you agree to participate in this study?**

- **نعم --- Yes**
- **لا --- No**

**TAME-ChatGPT scale as adopted from:**

Sallam M, Salim NA, Barakat M, Al-Mahzoum K, Al-Tammemi AB, Malaeb D, Hallit R, Hallit S. Assessing Health Students' Attitudes and Usage of ChatGPT in Jordan: Validation Study. JMIR Med Educ 2023;9:e48254; doi: 10.2196/48254; PMID: 37578934

**Usage scale:**

1. **Perceived usefulness**
2. ChatGPT helps me to save time when searching for information

يساعدني برنامج تشات جي بي تي في توفير الوقت عند البحث عن المعلومات

1. For me, ChatGPT is a reliable source of accurate information

بالنسبة لي ، يعد برنامج تشات جي بي تي مصدرًا موثوقًا للمعلومات الدقيقة

1. I recommend ChatGPT to my colleagues to facilitate their academic duties

أوصي ببرنامج تشات جي بي تي لزملائي لتسهيل واجباتهم الأكاديمية

1. ChatGPT is more useful than other sources of information that I have used previously

يعد برنامج تشات جي بي تي أكثر فائدة من مصادر المعلومات الأخرى التي استخدمتها سابقًا

1. I appreciate the accuracy and reliability of the information provided by ChatGPT

أقدر دقة وموثوقية المعلومات المقدمة من قِبَل برنامج تشات جي بي تي

1. I believe that using ChatGPT can save time and effort in my university assignments and duties

أعتقد أن استخدام برنامج تشات جي بي تي يمكن أن يساعد في توفير الوقت والجهد في المطلوب لأداء متطلباتي وواجباتي الجامعية

1. **Behavior/cognitive factors**
2. I have used tools or techniques similar to ChatGPT in the past

قمت باستخدام أدوات أو تقنيات مشابهة لبرنامج تشات جي بي تي في الماضي

1. I spontaneously find myself using ChatGPT when I need information for my university assignments and duties

أجد نفسي بشكل تلقائي مُستخدماً لبرنامج تشات جي بي تي عندما أحتاج إلى معلومات للقيام بواجباتي ومتطلباتي الجامعية

1. I often use ChatGPT as a source of information in my university assignments and duties

غالبًا ما أستخدم برنامج تشات جي بي تي كمصدر للمعلومات في واجباتي الجامعية

1. **Perceived risk of use** REVERSED SCORE
2. I am concerned that using ChatGPT would get me accused of plagiarism (REVERSED SCORE)

أخشى أن يؤدي استخدام برنامج تشات جي بي تي إلى اتهامي بالسرقة العلمية

1. I am concerned about the potential security risks of using ChatGPT (REVERSED SCORE)

أنا قلق بشأن المخاطر الأمنية المحتملة لاستخدام برنامج تشات جي بي تي

1. I think that relying on technology like ChatGPT can disrupt my critical thinking skills (REVERSED SCORE)

أعتقد أن الاعتماد على التكنولوجيا مثل برنامج تشات جي بي تي يمكن أن يُعطل من مهارات التفكير النقدي لديّ

1. **Perceived ease of use**
2. It does not take a long time to learn how to use ChatGPT

لا يستغرق تعلم كيفية استخدام برنامج تشات جي بي تي وقتًا طويلاً

1. ChatGPT does not require extensive technical knowledge

لا يتطلب استخدام برنامج تشات جي بي تي معرفة تقنية واسعة

**Heard of ChatGPT but did not use it**

1. **Perceived risk** REVERSED SCORE
2. I am concerned about the reliability of the information provided by ChatGPT (REVERSED SCORE)

أنا قَلِق بشأن مصداقية المعلومات التي يُقدمها برنامج تشات جي بي تي

1. I am concerned that using ChatGPT would get me accused of plagiarism (REVERSED SCORE)

أخشى أن يؤدي استخدام برنامج تشات جي بي تي إلى اتهامي بالسرقة العلمية

1. I am concerned about the potential security risks of using ChatGPT (REVERSED SCORE)

أنا قلق بشأن المخاطر الأمنية المحتملة لاستخدام برنامج تشات جي بي تي

1. I am afraid that the use of the ChatGPT would be a violation of academic and university policies (REVERSED SCORE)

أخشى أن يكون استخدام برنامج نشات جي بي تي يُعتبر انتهاكاً للسياسات الأكاديمية والجامعية

1. I am concerned about the potential privacy risks that might be associated with using ChatGPT (REVERSED SCORE)

أنا قلق بشأن مخاطر اختراق الخصوصية المحتملة لاستخدام برنامج تشات جي بي تي

1. **Anxiety** REVERSED SCORE
2. I am afraid of relying too much on ChatGPT and not developing my critical thinking skills (REVERSED SCORE)

أخشى الاعتماد بشكل كبير على برنامج تشات جي بي تي وعدم تطوير مهارات التفكير النقدي لديّ

1. I am afraid of becoming too dependent on technology like ChatGPT (REVERSED SCORE)

أخشى أن أصبح معتمدًا جدًا على التكنولوجيا مثل برنامج تشات جي بي تي

1. I am afraid that using ChatGPT would result in a lack of originality in my university assignments and duties (REVERSED SCORE)

أخشى أن يؤدي استخدام برنامج تشات جي بي تي إلى عدم وجود أصالة في واجباتي ومهماتي الجامعية

1. **Technology/social influence**
2. I am enthusiastic about using technology such as ChatGPT for learning and research

أنا متحمس لاستخدام التكنولوجيا مثل برنامج تشات جي بي تي للتعلم والبحث

1. I believe technology such as ChatGPT is an important tool for academic success

أعتقد أن التكنولوجيا مثل برنامج تشات جي بي تي هي أداة مهمة للنجاح الأكاديمي

1. I think that technology like ChatGPT is attractive and fun to use

أعتقد أن التكنولوجيا مثل برنامج تشات جي بي تي هي جذابة وممتعة في الاستخدام

1. I am always keen to learn about new technologies like ChatGPT

أنا دائمًا حريص على التعرف على التقنيات الجديدة مثل برنامج تشات جي بي تي

1. I trust the opinions of my friends or colleagues about using ChatGPT

أثق في آراء أصدقائي أو زملائي حول استخدام برنامج تشات جي بي تي

**Note 1.** Each question is scored on a 5-point Likert scale (agree, somewhat agree, neutral/no opinion, somewhat disagree, disagree)

**Note 2.** Two items are repeated in the Usage and Hearing scales (highlighted in red)
